# Supplementary material
Source: HighWire-hosted journal article supplement (https://jnis.bmj.com/content/11/7/625)
Supplement: inline-supplementary-material-2 [file inline-supplementary-material-2.docx]

|  | **Aspiration First** | **Stent Retriever First** |
| --- | --- | --- |
| **Frontline Strategy** | **(n=174)** | **(n=175)** |
| ACE 64 | 65 | 1 |
| ACE 60 | 12 | 0 |
| ACE68 | 1 | 0 |
| 3 MAX | 5 | 1 |
| 4 MAX | 10 | 0 |
| 5 MAX | 63 | 2 |
| SOFIA | 17 | 1 |
| ARC 6F | 1 | 0 |
| SOLITAIRE FR | 0 | 101 |
| TREVO | 0 | 56 |
| EMBOTRAP | 0 | 9 |
| EMBOLYS 5*21 | 0 | 1 |
| CATCH 3*15 | 0 | 1 |
| ERIC | 0 | 3 |
| PHENOX | 0 | 8 |
| REVIVE | 0 | 2 |
| **Rescue Strategy** | **(n=63)** | **(n=45)** |
| ACE 64 | 7 | 10 |
| ACE 60 | 0 | 0 |
| 3 MAX | 3 | 2 |
| 4 MAX | 3 | 0 |
| 5 MAX | 8 | 13 |
| SOFIA | 2 | 9 |
| SOLITAIRE FR | 23 | 16 |
| TREVO | 24 | 16 |
| EMBOTRAP | 1 | 1 |
| ERIC | 7 | 5 |
| PHENOX | 5 | 1 |
| MAVERICK | 0 | 1 |
| REVIVE | 1 | 0 |

supplemental Table. Detail of thrombectomy devices used in frontline and rescue strategies according to the assigned groups.
